# Supplementary material for: The amino terminal extension of mammalian mitochondrial RNA polymerase ensures promoter specific transcription initiation
Source: PubMed Central journal article supplement — Nucleic Acids Res. 2014 Jan 20;42(6):3638–47. doi: 10.1093/nar/gkt1397 (PMC3973307; doi:10.1093/nar/gkt1397), 2014-01-20
Supplement: supp_gkt1397_nar-03319-h-2013-File007.pdf [file supp_gkt1397_nar-03319-h-2013-File007.pdf]

Supplementary figure S1

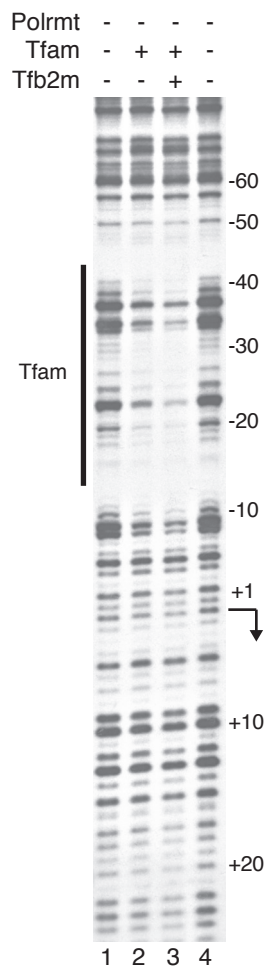

Figure S1. DNase I footprinting reveals a Tfam footprint (lane 2; (solid line marked Tfam) upstream the promoter. Addition of Tfb2m (lane 3) does not generate an additional footprint. The footprinting reaction was performed as described in Materials and Methods.
